# Supplementary material
Source: publisher site journal article supplement (https://www.dovepress.com/article/510375)
Supplement: Supplementary file 1 [file 25_Mar_2025_510375_Supplementary_Tables.docx]

Supplementary Table 1. Clinical manifestations of 94 patients with non-EoE EGIDs across various age groups

| General manifestations | Total (n=94) | Age groups | | | |
| --- | --- | --- | --- | --- | --- |
| 0–17 years  (n=12)  [juveniles] | 18–49 years  (n=57)  [young adults] | ≥50 years  (n=25)  [older adults] | p value |
| Abdominal pain, n (%) | 87 (92.6) | 11 (91.7) | 53 (93) | 23 (92) | 1.000 |
| Abdominal bloating, n (%) | 39(41.5) | 4 (33.3) | 29 (50.9) | 6 (24) | 0.062 |
| Diarrhea, n (%) | 44(46.8) | 4 (33.3) | 34 (59.6) | 6 (24) | **0.007** |
| Nausea, n (%) | 44 (46.8) | 10 (83.3) | 27 (47.4) | 7 (28) | **0.007** |
| Vomiting, n (%) | 47 (50) | 11 (91.7) | 30 (52.6) | 6 (24) | **＜0.001** |
| Acid regurgitation, n (%) | 20 (21.3) | 2 (16.7) | 13 (22.8) | 5 (20) | 0.880 |
| Heartburn, n (%) | 13 (13.8) | 1 (8.3) | 7 (12.3) | 5 (20) | 0.619 |
| Hiccups, n (%) | 2 (2.1) | 0 (0) | 1 (1.8) | 1 (4) | 0.635 |
| Reduced flatulence and/or defecation, n (%) | 10 (10.6) | 3 (25.0) | 2 (3.5) | 5 (20) | **0.013** |
| Dysphagia, n (%) | 3 (3.2) | 1 (8.3) | 1 (1.8) | 1 (4) | 0.341 |
| Black stool/bloody stool, n (%) | 4 (4.3) | 0 (0) | 4 (7.0) | 0 (0) | 0.446 |
| Weight loss, n (%) | 55 (58.5) | 4 (33.3) | 36 (63.2) | 15 (60) | 0.160 |
| Ascites, n (%) | 35 (37.2) | 9 (75) | 25 (43) | 1 (4) | **＜0.001** |
| Loss of appetite, n (%) | 42 (44.7) | 5 (41.7) | 26 (45.6) | 11 (44) | 0.966 |
| Abdominal distension, n (%) | 6 (6.4) | 0 (0) | 6 (10.5) | 0 (0) | 0.193 |
| Rash, n (%) | 9 (9.6) | 2 (16.7) | 6 (10.5) | 1 (4) | 0.350 |

EoE, eosinophilic esophagitis; EGIDs, eosinophilic gastrointestinal disorders; n, numbers.

Bold values indicate statistically significant differences (p < 0.05).

Supplementary Table 2. Clinical manifestations of 94 patients with non-EoE EGIDs across age groups stratified by inflammation sites

| General manifestations | Esophagus (n=9) | | | | Stomach (n=41) | | | | Duodenum (n=80) | | | |
| --- | --- | --- | --- | --- | --- | --- | --- | --- | --- | --- | --- | --- |
| 0–17 years  (n=0) | 18–49 years  (n=6) | ≥50 years  (n=3) | p value | 0–17 years  (n=5) | 18–49 years  (n=25) | ≥50 years  (n=11) | p value | 0–17 years  (n=10) | 18–49 years  (n=48) | ≥50 years  (n=22) | p value |
| Abdominal pain, n (%) | - | 6 (100) | 3 (100) | NA | 4 (80) | 24 (96) | 9 (81.8) | 0.186 | 9 (90) | 44 (91.7) | 22 (100) | 0.389 |
| Abdominal bloating, n (%) | - | 2 (33.3) | 0(0) | 0.50 | 2 (40) | 12 (48) | 2 (18.2) | 0.286 | 3 (30) | 25 (52.1) | 6 (27.3) | 0.104 |
| Diarrhea, n (%) | - | 5 (83.3) | 0(0) | **0.048** | 1 (20) | 16 (64) | 2 (18.2) | **0.019** | 3 (30) | 26 (54.2) | 6 (27.3) | 0.070 |
| Nausea, n (%) | - | 3 (50) | 2 (66.6) | 1.000 | 5 (100) | 11 (44) | 3 (27.3) | **0.027** | 9 (90) | 22 (45.8) | 7 (31.8) | **0.009** |
| Vomiting, n (%) | - | 3 (50) | 2 (66.6) | 1.000 | 5 (100) | 13 (52) | 3 (27.3) | **0.021** | 9 (90) | 24 (50) | 5 (22.7) | **0.002** |
| Acid regurgitation, n (%) | - | 1 (16.7) | 1 (33.3) | 1.000 | 1 (20) | 4 16() | 2 (18.2) | 1.000 | 1 (10) | 13 (27.1) | 4 (18.2) | 0.543 |
| Heartburn, n (%) | - | 1 (16.7) | 1 (33.3) | 1.000 | 0 (0) | 3 (12) | 2 (18.2) | 0.814 | 1 (10) | 7 (14.6) | 4 (18.2) | 0.904 |
| Hiccups, n (%) | - | 0 (0) | 0 (0) | NA | 0 (0) | 1 (4) | 0 (0) | 1.000 | 0 (0) | 0 (0) | 1 (4.5) | 0.400 |
| Reduced flatulence and/or defecation, n (%) | - | 0 (0) | 1 (33.3) | 0.333 | 1 (20) | 0 (0) | 2 (18.2) | 0.076 | 2 (20) | 2 (4.2) | 4 (18.2) | 0.053 |
| Dysphagia, n (%) | - | 0 (0) | 0 (0) | NA | 0 (0) | 1 (4) | 1 (9.1) | 0.634 | 1 (10) | 1 (2.1) | 0 (0) | 0.309 |
| Black stool/bloody stool, n (%) | - | 0 (0) | 0 (0) | NA | 0 (0) | 3 (12) | 0 (0) | 0.690 | 0 (0) | 1 (2.1) | 0 (0) | 1.000 |
| Weight loss, n (%) | - | 5 (83.3) | 2 (66.6) | 1.000 | 1 (20) | 14 (56) | 5 (45.5) | 0.398 | 3 (30) | 32 (66.7) | 13 (45.5) | 0.098 |
| Ascites, n (%) | - | 2 (33.3) | 0 (0) | 0.500 | 4 (80) | 10 (40) | 0 (0) | **0.002** | 7 (70) | 21 (43.8) | 1 (4.5) | **＜0.001** |
| Loss of appetite, n (%) | - | 0 (0) | 1 (33.3) | 0.333 | 2 (40) | 10 (40) | 4 (36.4) | 1.000 | 4 (40) | 24 (50) | 10 (45.5) | 0.826 |
| Abdominal distension, n (%) | - | 0 (0) | 0 (0) | NA | 0 (0) | 2 (8) | 0 (0) | 1.000 | 0 (0) | 5 (10.4) | 0 (0) | 0.236 |
| Rash, n (%) | - | 0 (0) | 0 (0) | NA | 2 (40) | 3 (12) | 0 (0) | 0.101 | 2 (20) | 5 (10.4) | 1 (4.5) | 0.409 |

| General manifestations | Jejunum (n=1) | | | | Ileum (n=34) | | | | Cecum (n=4) | | | | Colon (n=22) | | | | Rectum (n=4) | | | |
| --- | --- | --- | --- | --- | --- | --- | --- | --- | --- | --- | --- | --- | --- | --- | --- | --- | --- | --- | --- | --- |
| 0–17 years  (n=0) | 18–49 years  (n=1) | ≥50 years  (n=0) | p value | 0–17 years  (n=4) | 18–49 years  (n=19) | ≥50 years  (n=11) | p value | 0–17 years  (n=1) | 18–49 years  (n=1) | ≥50 years  (n=2) | p value | 0–17 years  (n=2) | 18–49 years  (n=13) | ≥50 years  (n=7) | p value | 0–17 years  (n=0) | 18–49 years  (n=3) | ≥50 years  (n=1) | p value |
| Abdominal pain, n (%) | - | 1 (100) | - | NA | 4 (100) | 17 (89.5) | 9 (81.8) | 0.770 | 1 (100) | 1 (100) | 2 (100) | NA | 2 (100) | 13 (100) | 6 (85.7) | 0.409 | - | 3 (100) | 1 (100) | NA |
| Abdominal bloating, n (%) | - | 1 (100) | - | NA | 1 (25) | 11 (57.9) | 4 (36.4) | 0.432 | 0 (0) | 0 (0) | 0 (0) | NA | 1 (50) | 7 (53.8) | 3 (42.9) | 1.000 | - | 2 (66.6) | 1(100) | 1.000 |
| Diarrhea, n (%) | - | 1 (100) | - | NA | 1 (25) | 13 (68.4) | 2 (18.2) | **0.019** | 1 (100) | 0 (0) | 0 (0) | 0.50 | 1 (50) | 9 (69.2) | 2 (28.6) | 0.252 | - | 2 (66.6) | 1(100) | 1.000 |
| Nausea, n (%) | - | 1 (100) | - | NA | 3 (75) | 10 (52.6) | 3 (27.3) | 0.220 | 1 (100) | 1 (100) | 0 (0) | 0.33 | 2 (100) | 7 (53.8) | 4 (57.1) | 0.674 | - | 2 (66.6) | 0 (0) | 1.000 |
| Vomiting, n (%) | - | 1 (100) | - | NA | 3 (75) | 12 (63.2) | 3 (27.3) | 0.141 | 1 (100) | 1 (100) | 0 (0) | 0.33 | 2 (100) | 7 (53.8) | 2 (28.6) | 0.208 | - | 2 (66.6) | 0 (0) | 1.000 |
| Acid regurgitation, n (%) | - | 0 (0) | - | NA | 1 (25) | 3 (15.8) | 2 (18.2) | 1.000 | 0 (0) | 1 (100) | 0 (0) | 0.50 | 1 (50) | 2 (15.4) | 1 (14.3) | 0.502 | - | 1 (33.3) | 0 (0) | 1.000 |
| Heartburn, n (%) | - | 0 (0) | - | NA | 0 (0) | 3 (15.8) | 3(27.3) | 0.556 | 0 (0) | 0 (0) | 0 (0) | NA | 0 (0) | 3 (23.1) | 2 (28.6) | 1.000 | - | 2 (66.6) | 1(100) | 1.000 |
| Hiccups, n (%) | - | 0 (0) | - | NA | 0 (0) | 0 (0) | 0 (0) | NA | 0 (0) | 0 (0) | 0 (0) | NA | 0 (0) | 0 (0) | 0 (0) | NA | - | 0 (0) | 0 (0) | N |
| Reduced flatulence and/or defecation, n (%) | - | 0 (0) | - | NA | 1 (25) | 1 (5.3) | 4 (36.4) | 0.072 | 0 (0) | 1 (100) | 1 (50) | 1.00 | 1 (50) | 0 (0) | 4 (57.1) | **0.005** | - | 0 (0) | 0 (0) | N |
| Dysphagia, n (%) | - | 0 (0) | - | NA | 0 (0) | 1 (5.3) | 1 (9.1) | 1.000 | 0 (0) | 0 (0) | 0 (0) | NA | 0 (0) | 0 (0) | 0 (0) | NA | - | 0 (0) | 0 (0) | N |
| Black stool/bloody stool, n (%) | - | 0 (0) | - | NA | 0 (0) | 0 (0) | 0 (0) | N | 0 (0) | 0 (0) | 0 (0) | NA | 0 (0) | 1(7.7) | 0 (0) | 1.000 | - | 1 (33.3) | 0 (0) | 1.000 |
| Weight loss, n (%) | - | 1 (100) | - | NA | 2 (50) | 14 (73.7) | 8 (72.8) | 0.746 | 0 (0) | 1 (100) | 1(50) | 1.00 | 1 (50) | 9 (69.2) | 4 (57.1) | 0.831 | - | 2 (66.6) | 0 (0) | 1.000 |
| Ascites, n (%) | - | 1 (100) | - | NA | 3 (75) | 8 (42.1) | 1 (9.1) | 0.031 | 0 (0) | 1 (100) | 0 (0) | 0.50 | 1 (50) | 6 (46.2) | 1 (14.3) | 0.343 | - | 2 (66.6) | 0 (0) | 1.000 |
| Loss of appetite, n (%) | - | 0 (0) | - | NA | 2 (50) | 8 (42.1) | 7 (63.7) | 0.634 | 0 (0) | 1 (100) | 0 (0) | 0.50 | 1 (50) | 5 (38.5) | 3 (42.9) | 1.000 | - | 1 (33.3) | 1(100) | 1.000 |
| Abdominal distension, n (%) | - | 0 (0) | - | NA | 0 (0) | 3 (15.8) | 0 (0) | 0.511 | 0 (0) | 0 (0) | 0 (0) | NA | 0 (0) | 2 (15.4) | 0 (0) | 0.606 | - | 0 (0) | 0 (0) | NA |
| Rash, n (%) | - | 0 (0) | - | NA | 0 (0) | 2 (10.5) | 1 (9.1) | 1.000 | 0 (0) | 0 (0) | 0 (0) | NA | 0 (0) | 1 (7.7) | 0 (0) | 1.000 | - | 0 (0) | 0 (0) | NA |

EoE, eosinophilic esophagitis; EGIDs, eosinophilic gastrointestinal disorders; n, numbers; NA, not applicable.

Bold values indicate statistically significant differences (p < 0.05).

Supplementary Table 3. Endoscopic findings of patients with non-EoE EGIDs across various age groups

| Endoscopic finding | Gastroscopy  n=91 | | | Colonoscopy  n=51 | | | | |
| --- | --- | --- | --- | --- | --- | --- | --- | --- |
| esophagus | stomach | duodenum | jejunum | Ileum | cecum | colon | rectum |
| Abnormalities, n (%) | 10 (11.0) | 63 (69.2) | 76 (83.5) | 2 (3.9) | 25 (49.0) | 1 (2.0) | 19 (37.3) | 14 (27.5) |
| Hyperemia | 6 (6.6) | 40 (44.0) | 50 (55.0) | 0 (0) | 11 (21.6) | 0 (0) | 7 (13.7) | 6 (11.7) |
| Edema | 4 (4.4) | 20 (22.0) | 26 (28.6) | 1 (2.0) | 4 (7.8) | 0 (0) | 5 (9.8) | 6 (11.7) |
| Erythema | 0 (0) | 14 (15.4) | 18 (19.8) | 0 (0) | 0 (0) | 0 (0) | 1 (2.0) | 3 (5.9) |
| Erosion | 6 (6.6) | 21 (23.1) | 12 (13.1) | 1 (2.0) | 9 (17.6) | 0 (0) | 0 (0) | 5 (9.8) |
| Rough | 2 (2.2) | 10 (11.0) | 8 (8.8) | 0 (0) | 7 (13.7) | 1 (2.0) | 0 (0) | 0 (0) |
| Bleeding | 2 (2.2) | 3 (3.3) | 7 (7.7) | 1 (2.0) | 1 (2.0) | 0 (0) | 0 (0) | 0 (0) |
| Ulcer | 2 (2.2) | 2 (2.2) | 7 (7.7) | 0 (0) | 3 (5.9) | 1 (2.0) | 3 (5.9) | 3 (5.9) |
| Eminence | 1 (1.1) | 13 (14.3) | 5 (5.5) | 0 (0) | 4 (7.8) | 0 (0) | 1 (2.0) | 1 (2.0) |
| Nodules | 1 (1.1) | 9 (9.9) | 2 (2.2) | 0 (0) | 0 (0) | 0 (0) | 1 (2.0) | 1 (2.0) |
| Leukoplakia | 0 (0) | 7 (7.7) | 3 (3.3) | 0 (0) | 0 (0) | 0 (0) | 0 (0) | 0 (0) |
